# Supplementary material for: Glutathione and a Pool of Metabolites Partly Related to Oxidative Stress Are Associated with Low and High Myopia in an Altered Bioenergetic Environment
Source: MDPI journal article supplement (doi:10.3390/antiox13050539), 2024-04-27
Supplement: s1 [file s1]

**Table S1.** List of the chemical shifts used to make metabolite assignments in aqueous humor <sup>1</sup>H NMR spectra. The preoperative procedure involving the use of antibiotic eye drops (Oftalmowell®) conditioned the presence of two metabolites (\*).

| ppm   | ID                     | Formula     | PubChem Compound | CAS Registry |
|-------|------------------------|-------------|------------------|--------------|
| 0,878 | Valerate               | C5H10O2     | 7991             | 109-52-4     |
| 0,894 | Butyrate               | C4H8O2      | 264              | 107-92-6     |
| 0,91  | 2-Hydroxybutyrate      | C4H8O3      | 11266            | 565-70-8     |
| 0,949 | Leucine                | C6H13NO2    | 6106             | 61-90-5      |
| 0,97  | 2-Aminobutyrate        | C4H9NO2     | 80283            | 1492-24-6    |
| 1,002 | Isoleucine             | C6H13NO2    | 6306             | 73-32-5      |
| 1,034 | Valine                 | C5H11NO2    | 6287             | 72-18-4      |
| 1,061 | 3-Hydroxyisobutyrate   | C4H8O3      | 87               | 2068-83-9    |
| 1,067 | Isobutyrate            | C4H8O2      | 6590             | 79-31-2      |
| 1,14  | Propylene glycol*      | C3H8O2      | 1030             | 57-55-6      |
| 1,169 | Isopropanol            | C3H8O       | 3776             | 67-63-0      |
| 1,179 | Ethanol*               | C2H6O       | 702              | 64-17-5      |
| 1,198 | 3-Hydroxybutyrate      | C4H8O3      | 92135            | 625-72-9     |
| 1,324 | Lactate                | C3H6O3      | 107689           | 79-33-4      |
| 1,428 | 2-Phenylpropionate     | C9H10O2     | 10296            | 492-37-5     |
| 1,471 | Alanine                | C3H7NO2     | 5950             | 56-41-7      |
| 1,63  | Adipate                | C6H10O4     | 196              | 124-04-9     |
| 1,715 | Lysine                 | C6H14N2O2   | 5962             | 56-87-1      |
| 1,912 | Acetate                | C2H4O2      | 176              | 64-19-7      |
| 1,923 | N-Acetyltyrosine       | C11H13NO4   | 68310            | 537-55-3     |
| 2,229 | Acetone                | C3H6O       | 180              | 67-64-1      |
| 2,287 | 4-Aminobutyrate        | C4H9NO2     | 119              | 56-12-2      |
| 2,309 | Glutamate              | C5H9NO4     | 33032            | 56-86-0      |
| 2,367 | Pyruvate               | C3H4O3      | 1060             | 127-17-3     |
| 2,398 | Succinate              | C4H6O4      | 1110             | 110-15-6     |
| 2,46  | Glutamine              | C5H10N2O3   | 5961             | 56-85-9      |
| 2,528 | Citrate                | C6H8O7      | 311              | 77-92-9      |
| 2,578 | Glutathione            | C10H17N3O6S | 124886           | 70-18-8      |
| 2,609 | Methylamine            | CH5N        | 6329             | 74-89-5      |
| 2,722 | Dimethylamine          | C2H7N       | 674              | 124-40-3     |
| 2,73  | Sarcosine              | C3H7NO2     | 1088             | 107-97-1     |
| 2,896 | Trimethylamine         | C3H9N       | 1146             | 75-50-3      |
| 3,032 | Creatine phosphate     | C4H10N3O5P  | 9548602          | 67-07-2      |
| 3,036 | Creatine               | C4H9N3O2    | 586              | 57-00-1      |
| 3,04  | Creatinine             | C4H7N3O     | 588              | 60-27-5      |
| 3,149 | Ethanolamine           | C2H7NO      | 700              | 141-43-5     |
| 3,149 | N-Nitrosodimethylamine | C2H6N2O     | 6124             | 62-75-9      |



|       |                             |                                                               |        |            |
|-------|-----------------------------|---------------------------------------------------------------|--------|------------|
| 3,187 | O-Acetylcarnitine           | C <sub>9</sub> H <sub>18</sub> NO <sub>4</sub>                | 18230  | 3040-38-8  |
| 3,193 | Choline                     | C <sub>5</sub> H <sub>14</sub> NO                             | 305    | 62-49-7    |
| 3,196 | O-Acetylcholine             | C <sub>7</sub> H <sub>16</sub> NO <sub>2</sub>                | 187    | 51-84-3    |
| 3,21  | sn-Glycero-3-phosphocholine | C <sub>8</sub> H <sub>21</sub> NO <sub>6</sub> P              | 439285 | 28319-77-9 |
| 3,218 | O-Phosphocholine            | C <sub>5</sub> H <sub>15</sub> NO <sub>4</sub> P              | 1014   | 107-73-3   |
| 3,242 | Taurine                     | C <sub>2</sub> H <sub>7</sub> NO <sub>3</sub> S               | 1123   | 107-35-7   |
| 3,257 | Trimethylamine N-oxide      | C <sub>3</sub> H <sub>9</sub> NO                              | 1145   | 1184-78-7  |
| 3,281 | myo-Inositol                | C <sub>6</sub> H <sub>12</sub> O <sub>6</sub>                 | 892    | 87-89-8    |
| 3,29  | 1,7-Dimethylxanthine        | C <sub>7</sub> H <sub>8</sub> N <sub>4</sub> O <sub>2</sub>   | 4687   | 611-59-6   |
| 3,359 | Methanol                    | CH <sub>4</sub> O                                             | 887    | 67-56-1    |
| 3,551 | Glycine                     | C <sub>2</sub> H <sub>5</sub> NO <sub>2</sub>                 | 750    | 56-40-6    |
| 4,017 | Ascorbate                   | C <sub>6</sub> H <sub>8</sub> O <sub>6</sub>                  | 5785   | 50-81-7    |
| 4,251 | Threonine                   | C <sub>4</sub> H <sub>9</sub> NO <sub>3</sub>                 | 6288   | 72-19-5    |
| 5,232 | Glucose                     | C <sub>6</sub> H <sub>12</sub> O <sub>6</sub>                 | 5793   | 50-99-7    |
| 7,007 | τ-Methylhistidine           | C <sub>7</sub> H <sub>11</sub> N <sub>3</sub> O <sub>2</sub>  | 92105  | 332-80-9   |
| 7,04  | π-Methylhistidine           | C <sub>7</sub> H <sub>11</sub> N <sub>3</sub> O <sub>2</sub>  | 64969  | 368-16-1   |
| 7,189 | Tyrosine                    | C <sub>9</sub> H <sub>11</sub> NO <sub>3</sub>                | 6057   | 60-18-4    |
| 7,215 | Tyramine                    | C <sub>8</sub> H <sub>11</sub> NO                             | 5610   | 51-67-2    |
| 7,427 | Phenylalanine               | C <sub>9</sub> H <sub>11</sub> NO <sub>2</sub>                | 6140   | 63-91-2    |
| 7,53  | Tryptophan                  | C <sub>11</sub> H <sub>12</sub> N <sub>2</sub> O <sub>2</sub> | 6305   | 73-22-3    |
| 7,829 | Histidine                   | C <sub>6</sub> H <sub>9</sub> N <sub>3</sub> O <sub>2</sub>   | 6274   | 71-00-1    |
| 8,445 | Formate                     | CH <sub>2</sub> O <sub>2</sub>                                | 284    | 64-18-6    |

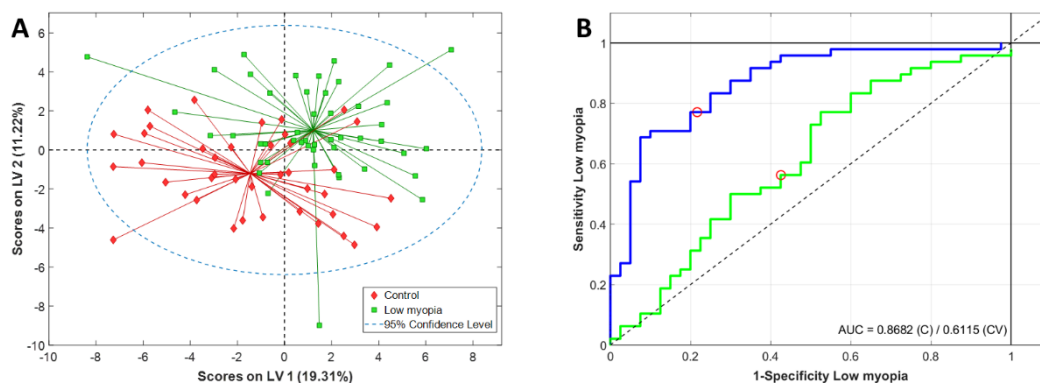

Figure S1. (A) Score plot of the PLS-DA of the metabolome for the discrimination between the control group (red diamonds) and LM group (green squares). (B) Receiver-operating curve (ROC) analysis for discrimination between the control group and HM samples based on our PLS-DA model.



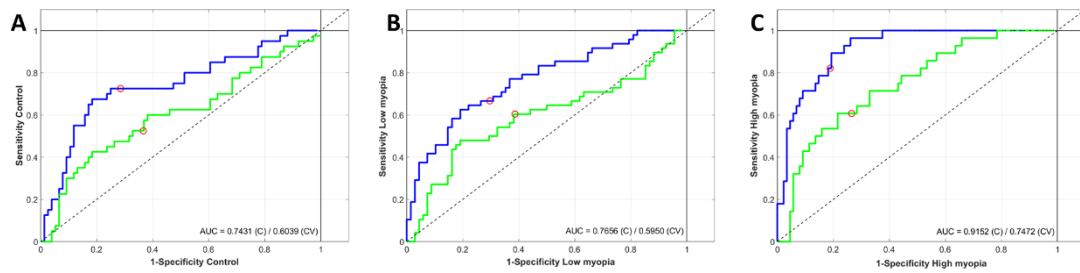

Figure S2: Receiver-operating curve (ROC) analysis for the classification of each individual group: (A) control group, (B) LM group, and (C) HM group based on our PLS-DA model.

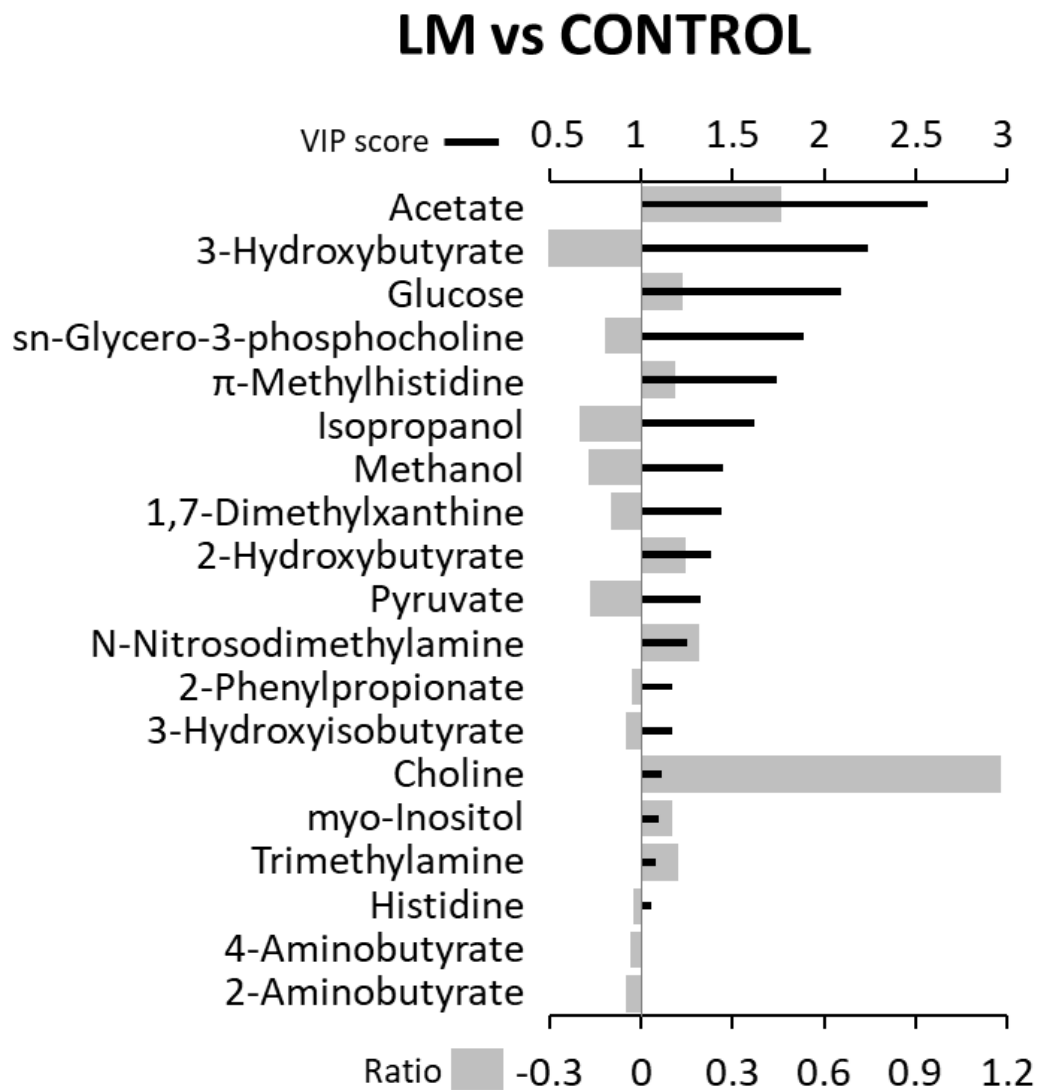

Figure S3: VIP score and relative fold change bar plot of the model for discriminating between the LM and control groups.



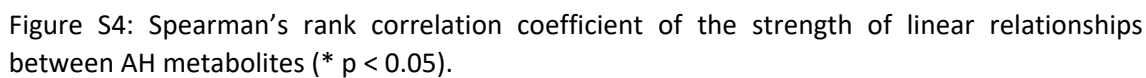

Figure S4: Spearman's rank correlation coefficient of the strength of linear relationships between AH metabolites (\*  $p < 0.05$ ).



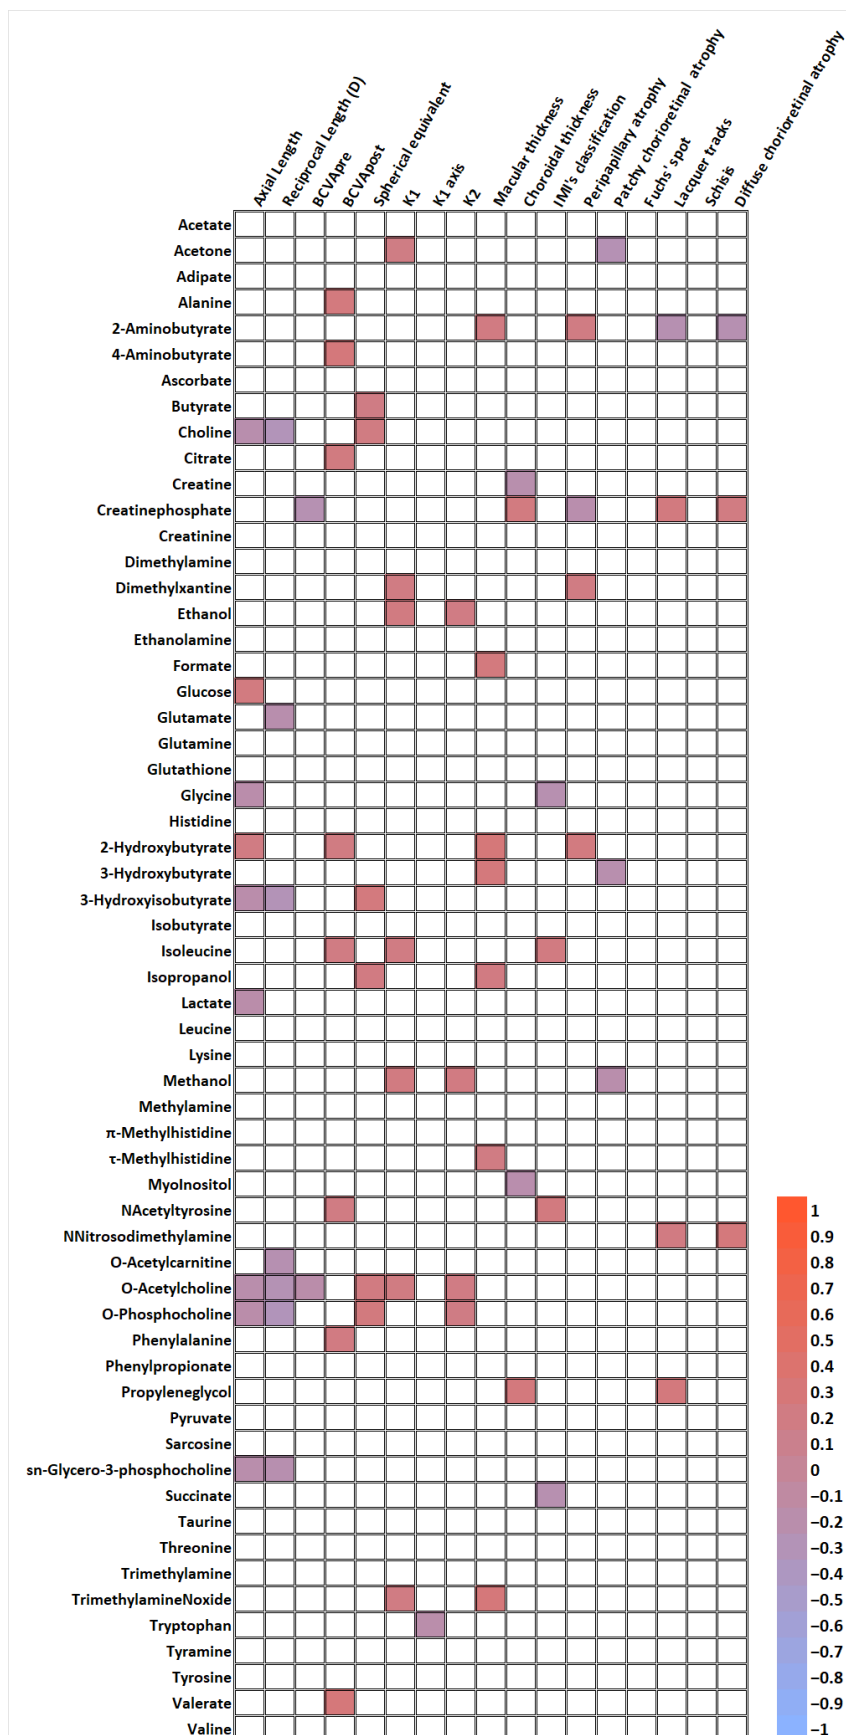

Figure S5: Spearman's rank correlation coefficient of the strength of linear relationships between paired clinical data and AH metabolites (\*  $p < 0.05$ ).
